1 RESEARCH PAPER FOR WATER RESEARCH

2

3 **Predicting the number of people infected with SARS-COV-2 in a population using**  
4 **statistical models based on wastewater viral load**

5

6 Juan A. Vallejo<sup>a,\*</sup>, Soraya Rumbo-Feal<sup>a,\*</sup>, Kelly Conde-Pérez<sup>a,\*</sup>, Ángel López-Oriona<sup>b,\*</sup>,  
7 Javier Tarrío-Saavedra<sup>b</sup>, Rubén Reif<sup>c</sup>, Susana Ladra<sup>d</sup>, Bruno K. Rodiño-Janeiro<sup>e</sup>,  
8 Mohammed Nasser<sup>a</sup>, Ángeles Cid<sup>f,c</sup>, María C Veiga<sup>c</sup>, Antón Acevedo<sup>g</sup>, Carlos Lamora<sup>h</sup>,  
9 Germán Bou<sup>a</sup>, Ricardo Cao<sup>b,i#</sup> and Margarita Poza<sup>a,f,#</sup>

10

11 \*Authors contributed equally

12 #Authors for corresponding

13

14 <sup>a</sup> Microbiology Research Group, University Hospital Complex (CHUAC) - Institute of  
15 Biomedical Research (INIBIC) -University of A Coruña (UDC), Servicio de  
16 Microbiología, 3<sup>a</sup> planta, Edificio Sur, Hospital Universitario, As Xubias 15006, A  
17 Coruña, Spain.

18 <sup>b</sup> Research Group MODES, Research Center for Information and Communication  
19 Technologies (CITIC), University of A Coruña (UDC), Facultade de Informática,  
20 Campus de Elviña, 15071 A Coruña, Spain.

21 <sup>c</sup> Advanced Scientific Research Center (CICA), University of A Coruña (UDC), As  
22 Carballeiras, Campus de Elviña 15071 A Coruña, Spain.

23 <sup>d</sup> Database Laboratory, Research Center for Information and Communication  
24 Technologies (CITIC), University of A Coruña (UDC), Campus de Elviña, 15008 A  
25 Coruña, Spain..

**NOTE: This preprint reports new research that has not been certified by peer review and should not be used to guide clinical practice.**

26 <sup>e</sup> BFlow, Campus Vida, Universidade Santiago de Compostela and Instituto de  
27 Investigación Sanitaria de Santiago de Compostela, Edificio Emprendia, Avenida do  
28 Mestre Mateo, 2, 15706 Santiago de Compostela, A Coruña, Spain.

29 <sup>f</sup> Department of Biology, University of A Coruña (UDC), Campus da Zapateira, 15071  
30 A Coruña, Spain.

31 <sup>g</sup> General Directorate of Social Health Care, Xunta de Galicia, Edificios  
32 Administrativos, San Caetano s/n, 15781 Santiago de Compostela, A Coruña, Spain.

33 <sup>h</sup> Public wastewater treatment plant company EDAR Bens, S.A., Lugar de Bens, 15010  
34 A Coruña, Spain.

35 <sup>i</sup> Technological Institute for Industrial Mathematics (ITMATI), Universities of A  
36 Coruña (UDC), Santiago de Compostela (USC) and Vigo (UVIGO), Campus Vida, Rúa  
37 de Constantino Candeira, 15705 Santiago de Compostela, Spain.

38

## 39 **AUTHORS FOR CORRESPONDENCE**

### 40 **Ricardo Cao**

41 Email: [ricardo.cao@udc.es](mailto:ricardo.cao@udc.es)

42 Address: Facultade de Informática, Campus de Elviña s/n, 15071 A Coruña, Spain.

### 43 **Margarita Poza**

44 Email: [margarita.poza.dominguez@sergas.es](mailto:margarita.poza.dominguez@sergas.es)

45 Address: Servicio de Microbiología, 3ª Planta, Edificio Sur, Hospital Universitario, As  
46 Xubias, 15006, A Coruña, Spain.

47

48

49

50

51 **ABSTRACT (150 words)**

52 The quantification of the SARS-CoV-2 RNA load in wastewater has emerged as a  
53 useful tool to monitor COVID-19 outbreaks in the community. This approach was  
54 implemented in the metropolitan area of A Coruña (NW Spain), where wastewater from  
55 a treatment plant was analyzed to track the epidemic dynamics in a population of  
56 369,098 inhabitants. Statistical regression models from the viral load detected in the  
57 wastewater and the epidemiological data from A Coruña health system that allowed us  
58 to estimate the number of infected people, including symptomatic and asymptomatic  
59 individuals, with reliability close to 90%, were developed. These models can help to  
60 understand the real magnitude of the epidemic in a population at any given time and can  
61 be used as an effective early warning tool for predicting outbreaks. The methodology of  
62 the present work could be used to develop a similar wastewater-based epidemiological  
63 model to track the evolution of the COVID-19 epidemic anywhere in the world.

64

65 **RUNNING TITLE**

66 *SARS-CoV-2 reliable surveillance on sewage*

67

68 **KEYWORDS**

69 SARS-CoV-2, COVID-19, wastewater-based epidemiology, generalized additive  
70 models (GAM), kernel smoothing, LOESS

71

72 **1. INTRODUCTION**

73 According to previous reports, a great proportion of patients infected with SARS-CoV-2  
74 are asymptomatic (Bi et al. 2020, Day 2020, Randazzo et al. 2020a, Yang et al. 2020), a  
75 condition that depends on many factors such as the mean age in the population and that

76 promotes the undetected spread of COVID-19. A systematic literature review found that  
77 at least an important proportion of COVID-19 patients, including symptomatic and  
78 asymptomatic people, tested for fecal viral RNA were positive from initial steps of  
79 infection (Gupta et al, 2020). This excreta of viral RNA in patients stool occurs for an  
80 extended period, importantly even more than a month after the patient has tested  
81 negative for their respiratory samples (Chen et al. 2020, Wölfel et al. 2020, Wu et al.  
82 2020a, Xing et al. 2020, Xu et al. 2020, Zhang et al. 2020). Therefore, genetic material  
83 of SARS-CoV-2 can be found in wastewater (Lodder and de Roda Husman 2020),  
84 which has made monitoring of viral RNA load in sewage an excellent tool for the  
85 epidemiological tracking of the actual pandemic as well as an extremely efficient early  
86 warning tool for outbreaks detection (Randazzo et al. 2020a, Ahmed et al. 2020,  
87 Medema et al. 2020, Peccia et al. 2020, Wu et al. 2020b, Wurtzer et al. 2020).

88 Wastewater is a dynamic system and its analysis can provide a faithful reflection of the  
89 circulation of microorganisms in the population. Previous studies have evaluated the  
90 presence in wastewater of other viruses, such as enterovirus, norovirus, hepatitis A  
91 virus, adenovirus, poliovirus or sapovirus (Ehlers et al. 2005, Hellmér et al. 2014, Hovi  
92 et al. 2012, Lizasoain et al. 2018, Mancini et al. 2019). During the present global  
93 COVID-19 pandemic, processes to monitor SARS-CoV-2 in wastewater were first  
94 developed in the Netherlands (Medema et al. 2020), followed by the USA (Nemudryi et  
95 al. 2020), France (Wurtzer et al. 2020), Australia (Ahmed et al. 2020), Italy (La Rosa et  
96 al. 2020) and Spain (Randazzo et al. 2020a, Randazzo et al. 2020b). In the first study to  
97 look at SARS-CoV-2 in wastewater, seven cities and Schiphol airport in the  
98 Netherlands were monitored during the early stages of the pandemic. Genetic material  
99 started to appear at more sites over time, as the number of cases of COVID-19 increased  
100 (Medema et al. 2020). In the USA, a wastewater plant in Massachusetts detected a viral

101 RNA load higher than expected based on the number of confirmed cases, reflecting  
102 viral shedding of asymptomatic cases in the community (Wu et al. 2020b). Three  
103 wastewater plants in Paris measured the concentration of the virus over a 7-week period  
104 that included the beginning of the lockdown on March 17<sup>th</sup>. They found that viral RNA  
105 load was correlated with the number of confirmed COVID-19 cases. They also noted  
106 that viral RNA could be detected in the wastewater before the exponential growth of the  
107 disease and that the amount of viral RNA decreased as the number of COVID-19 cases  
108 went down, roughly following an eight-day delay (Wurtzer et al. 2020). Another study  
109 of six wastewater plants in Spain, covering a region with the lowest prevalence of  
110 COVID-19, also detected the virus in wastewater before the first COVID-19 cases were  
111 reported (Randazzo et al. 2020a). A recent study from Yale University took a different  
112 approach by measuring the concentration of SARS-CoV-2 RNA in sewage sludge in  
113 New Haven (Connecticut, USA), as opposed to wastewater. They tracked viral RNA  
114 concentrations against hospital daily admissions and confirmed COVID-19 cases in the  
115 community. They found that viral RNA concentrations were highest 3 days before peak  
116 hospital admissions, and 7 days before peak community COVID-19 cases, which  
117 showed that virus RNA concentration is an earlier indicator of progression of COVID-  
118 19 in the community than traditional epidemiological indicators (Peccia et al. 2020).  
119 Also, the presence of SARS-CoV-2 in sludge at concentrations potentially suitable for  
120 monitoring was confirmed (Balboa et al. 2020). These studies showed the potential of  
121 monitoring SARS-CoV-2 levels in wastewater and sewage sludge to track and even pre-  
122 empt outbreaks in the community.

123 During the last decade, Wastewater-Based Epidemiology (WBE) has emerged as a  
124 highly relevant discipline with the potential to provide objective information by  
125 combining the use of cutting-edge analytical methodologies with the development of *ad*

126 *hoc* modelling approaches. WBE has been extensively used to predict with high  
127 accuracy the consumption patterns of numerous substances, such as the use of illicit  
128 drugs in different populations or countries (EMCDDA 2020). Therefore, the  
129 development of epidemiology models based on wastewater analysis has been intensive  
130 in the last years. Several examples from the literature showed different approaches and  
131 strategies to tackle the uncertainty associated with WBE studies. For example, Goulding  
132 and Hickman assumed three main sources of uncertainty (fluctuations in flow,  
133 uncertainty in analytical determinations, and the actual size of the population served by  
134 the wastewater treatment plant) and, using Bayesian statistics, fitted the data to linear  
135 regression hierarchical models (Goulding and Hickman 2020). Other modelling  
136 approaches (Croft et al. 2020) considered Monte Carlo simulations to deal with  
137 uncertainties and with the propagation of errors associated with the parameters that are  
138 usually considered in WBE. Again, wastewater inflow variability was highlighted as a  
139 prominent source of uncertainty, as well as the stability of the substances in wastewater  
140 and their pharmacokinetics. In general, WBE studies showed that despite the wide  
141 number of parameters involved in predicting the consumption rate of a specific  
142 substance, a correct selection of assumptions combined with a thoughtful modelling  
143 process will overcome such uncertainty, leading to accurate results. Recently, a study  
144 has confirmed the theoretical feasibility of combining WBE approaches with SARS-  
145 CoV-2/COVID-19 data (Hart and Halden 2020).

146 The main objective of the present work was to develop a useful statistical model to  
147 determine the entire SARS-CoV-2 infected population, including symptomatic and  
148 asymptomatic people, as well as to predict outbreaks, by tracking the viral load present  
149 in the wastewater of a treatment plant located in the Northwest of Spain that serves a  
150 metropolitan area with near 370,000 residents.

## 151 2. MATERIAL AND METHODS

152

### 153 2.1. Sample Collection

154 The wastewater treatment plant (WWTP) Bens (43° 22' 8.4" N 8° 27' 10.7" W, A  
155 Coruña, Spain) serves the metropolitan area of A Coruña, which includes the  
156 municipalities of A Coruña, Oleiros, Culleredo, Cambre and Arteixo, which correspond  
157 to a geographical area of 277.8 km<sup>2</sup> and to a population of 369,098 inhabitants (Figure  
158 1). The wastewater samples were collected by automatic samplers installed both at the  
159 entrance of the WWTP Bens and in a sewer collecting sewage from COVID-19 patients  
160 housed on 7 floors of the University Hospital of A Coruña (CHUAC). At the WWTP  
161 Bens, 24-h composite samples were collected from April 15<sup>th</sup> until June 4<sup>th</sup>, while at  
162 CHUAC 24-h composite samples were collected from April 22<sup>nd</sup> to May 14<sup>th</sup> (Dataset  
163 S1). In addition, samples were collected at 2-h intervals for 24 h on specific days at the  
164 WWTP Bens and at CHUAC (Dataset S1). The 24-h composite samples were collected  
165 by automatic samplers taking wastewater every 15 min in 24 bottles (1 h per bottle) and,  
166 when the 24-h collection ended, the 24 bottles were integrated and a representative  
167 sample of 100 mL was collected. For the collection of 2 h intervals, 2 bottles obtained  
168 every 2 h were integrated, finally providing 12 bottles per day.

169

### 170 2.2. Sample processing

171 Samples of 100 mL were processed immediately after collection at 4 °C. Firstly, 100 mL  
172 samples were centrifuged for 30 min at 4000 *x g* and then filtered through 0.22 µm membranes.  
173 Samples were then concentrated and dialyzed using Amicon Ultra Filters 30 KDa (Merck  
174 Millipore) in 500 µL of a buffer containing 50 mM Tris-HCL, 100 mM NaCl y 8 mM MgSO<sub>4</sub>.  
175 Samples were preserved in RNAlater reagent (Sigma-Aldrich) at -80 °C.

176

### 177 **2.3. RNA extraction and qRT-PCR assays**

178 RNA was extracted from the concentrates using the QIAamp Viral RNA Mini Kit  
179 (Qiagen, Germany) according to manufacturer's instructions. Briefly, the sample was  
180 lysed under highly denaturing conditions to inactivate RNases and to ensure isolation of  
181 intact viral RNA. Then, the sample was loaded in the QIAamp Mini spin column where  
182 RNA was retained in the QIAamp membrane. Samples were washed twice using  
183 washing buffers. Finally, RNA was eluted in an RNase-free buffer. The quality and  
184 quantity of the RNA was checked using a Nanodrop Instrument and an Agilent  
185 Bioanalyzer. Samples were kept at -80°C until use.

186

187 RT-qPCR assays were done in a CFX 96 System (BioRad, USA) using the qCOVID-19  
188 kit (GENOMICA, Spain) through N gene (coding for nucleocapsid protein N)  
189 amplification. Reaction mix (15 µL) consisted of: 5 µL 4x RT-PCR Mix containing  
190 DNA polymerase, dNTPs, PCR buffer and a VIC internal control; 1 µL of Reaction Mix  
191 1 containing primers and FAM probe for N gene; and 0.2 µL of reverse transcriptase  
192 enzyme. The internal control allowed discarding the presence of inhibitors. The cycling  
193 parameters were 50 °C for 20 minutes for the retrotranscription step, followed a PCR  
194 program consisting of a preheating cycle of 95 °C for 2 min, 50 cycles of amplification  
195 at 95 °C for 5 s and finally one cycle of 60 °C for 30 s. RT-qPCR assays were done in  
196 sextuplicate.

197

198 For RNA quantification, a reference pattern was standardized using the Human 2019-  
199 nCoV RNA standard from European Virus Archive Glogal (EVAg) (Figure S1). To  
200 build the calibration curve, the decimal logarithm of SARS-CoV-2 RNA copies/µL



201 ranging from 5 to 500 were plotted against Ct (threshold cycle) values. Calibration was  
202 done amplifying the N gene.

#### 203 **2.4. Data collection**

204 The model was fully customized to the scenario of the metropolitan area of A Coruña  
205 integrating data gathered from different sources:

206 Daily observations at the meteorological station of A Coruña-Bens for the period March  
207 1<sup>st</sup> – May 31<sup>st</sup>, 2020, including rainfall, temperature, and humidity (source: Galician  
208 Meteorology Agency, MeteoGalicia (Dataset S2)).

209 Cumulative and active number of COVID-19 cases in the metropolitan area of A Coruña and  
210 from the health area A Coruña – Cee for the period March 1<sup>st</sup> – May 31<sup>st</sup> (source:Galician  
211 Health Service (SERGAS), the General Directorate of Public Health (Autonomous Government of  
212 Galicia) and the University Hospital of A Coruña (CHUAC) (Dataset S3).) Since flow may be  
213 an important variable when determining the viral load in the wastewater, an exploratory  
214 data analysis for the volume of water pumped at the WWTP Bens during the lockdown  
215 period has been performed using flow data (Dataset S4). This flow study is described in  
216 the Supplementary Material section.

217

#### 218 **2.5. Backcasting of COVID-19 active cases**

219 Preliminary statistical methods have been devised to backcast the number of COVID-19  
220 active cases based on reported official cases.

221 Follow-up times (available only until May 7<sup>th</sup>) for anonymized individual reported  
222 COVID-19 cases in Galicia (NW Spain where the WWTP Bens is located, Figure 1)  
223 have been used to count the number of cases by municipality based on patient zip codes.  
224 Since the epidemiological discharge time is missing, the number of active cases in the  
225 metropolitan area of A Coruña could not be obtained but the cumulative number of

226 cases was computed. On the other hand, the main epidemiological series for COVID-19  
227 were publicly available in Galicia at the level of health areas. However, the definition of  
228 one of the series changed from cumulative cases to active cases in April 29<sup>th</sup>.  
229 Thus, the epidemiological series for COVID-19 in the health area of A Coruña – Cee  
230 (population 551,937) was used to estimate the epidemiological series for COVID-19 for  
231 the metropolitan area of A Coruña (population 369,098). To do this, a linear regression  
232 model was used to relate the relative cumulative and active cases (cases per million) of  
233 COVID-19 for the health area of A Coruña – Cee. Predicting the rate of active cases and  
234 considering the population size in the metropolitan area gives the estimated total  
235 number of official active cases in the five municipalities.  
236 The previous approach is only possible until May 7<sup>th</sup>, our database update date. To  
237 estimate the number of official active cases from May 8<sup>th</sup> onwards, another linear  
238 regression model has been used to relate the number of active cases in the health area of  
239 A Coruña – Cee and in the metropolitan area of A Coruña. Since the number of active  
240 cases in the health area has been reported until June 5<sup>th</sup>, the series of estimated official  
241 active cases could be backcasted from May 8<sup>th</sup> until June 5<sup>th</sup>.  
242 Finally, to transform the official number of COVID-19 cases into the real number, the  
243 ratio mean of real cases / mean of official cases was estimated using the official figures  
244 of cumulative cases. The results of the seroprevalence study carried out by the National  
245 Center of Epidemiology in Spain were used to estimate the number of actual active  
246 cases in Galicia: 56,713 for April 27<sup>th</sup> – May 11<sup>th</sup> (prevalence 2.1%) and 59,414 for  
247 May 18<sup>th</sup> – June 1<sup>st</sup> (prevalence 2.2%) (Pollán et al. 2020). Confronting these numbers  
248 with the official numbers in May 11<sup>th</sup> (10,669) and June 1<sup>st</sup> (11,308) gives estimated  
249 ratios of 5.316 and 5.254 in these two periods, with an average of around 5.29. This  
250 conversion factor was used to backcast the series of real active cases based on the

251 estimated daily official COVID-19 cases in the metropolitan area of A Coruña. Some of  
252 these series, including the backcasted series of real active cases, are included in the  
253 Dataset S3.

## 254 **2.6. Nonparametric setting of viral load overtime**

255 Generalized Additive Models (GAM) using a basis of cubic regression splines (Hastie  
256 et al. 1990) and LOESS (Cleveland 1979) nonparametric regression models have been  
257 used to fit the viral load along the day on May 5<sup>th</sup>, 6<sup>th</sup>, 11<sup>th</sup> and 12<sup>th</sup>, and as a function of  
258 time at CHUAC from April 22<sup>nd</sup> to May 12<sup>th</sup> and at WWTP Bens from April 16<sup>th</sup> to  
259 June 3<sup>rd</sup>. Several outliers have been removed from the data, corresponding to  
260 unexpected and intensive pipeline cleaning episodes (8-hour 70 °C water cleaning  
261 during Thursday-Friday nights) carried out in April 23<sup>rd</sup>-24<sup>th</sup>, April 30<sup>th</sup> - May 1<sup>st</sup> and  
262 May 7<sup>th</sup>-8<sup>th</sup>.

263

## 264 **2.7. Viral load models**

265 In order to find a useful statistical model to predict the number of real infected cases,  
266 including symptomatic and asymptomatic people, well-known regression models, such  
267 as simple and multivariate linear models, and more flexible models, such as  
268 nonparametric (e.g. local linear polynomial regression) and semiparametric (GAM and  
269 LOESS) models, have been formulated. The flexible ones allowed the introduction of  
270 linear and smooth effects of the predictors on the response.

271 All these models have been successfully used to predict the number of COVID-19  
272 active cases based on the measured viral load (number of RNA copies/L) at WWTP  
273 Bens, daily flow in the sewage network as well as other environmental variables, such  
274 as rainfall, temperature and humidity.

275 Diagnostic tests (Q-Q plots, residuals versus fitted values plots and Cook's distance)  
276 were used for outlier detection, which improved the models fit. The R statistical  
277 software was used to perform statistical analyses (R Core Team, available at  
278 <https://www.R-project.org/>). Namely, the mgcv library (Wood 2006) was applied to fit  
279 GAM models and ggplot2 and GGally (Schloerke et al. 2020, Wickham 2016) to  
280 perform correlation analysis, obtain graphical output and fit LOESS models,  
281 respectively. The caret R package was used to fit and evaluate regression models.

282

283 Although some RT-qPCR replicates could not be measured when the viral load was  
284 scarce, due to the limitation of the detection technique (errors randomly occur when the  
285 number of copies/L is under 10,000), 74% of the assays led to three or more measured  
286 replications, which gives a good statistical approach. However, conditional mean  
287 imputation (Enders 2010) was used for unmeasured replications. Thus, unmeasured  
288 replications in an assay were replaced by the sample mean of observed measurements in  
289 that assay. In the only assay with all (six) unmeasured replications, the number of RNA  
290 copies was imputed using the minimum of measured viral load along the whole set of  
291 assays.

292

### 293 **3. RESULTS**

294

#### 295 **3.1. Estimated COVID-19 positive cases in the metropolitan area of A Coruña**

296 To model the viral load, the number of COVID-19 positive cases needed to be reported  
297 or estimated (Figure 2). However, due to difficulties in determining the exact number of  
298 positive cases, mathematical models had to be developed based on data recovered in  
299 Dataset S3. Thus, linear regression models (Figure 3) were successfully used to estimate

300 COVID-19 positive cases in the A Coruña – Cee health area, where the region of this  
301 study is located (Figure 1). This was based on Intensive Care Unit (ICU) patients before  
302 April 29<sup>th</sup> (Figure 3A) and, from this date on, on positive cases reported by health  
303 authorities in Galicia. A linear regression trend was fitted to predict the proportion of  
304 positive cases in the health area of A Coruña – Cee based on the proportion of  
305 cumulative cases (Figure 3B). This linear regression fit was finally used to estimate the  
306 positive cases in the metropolitan area of A Coruña served by the WWTP Bens, by  
307 means of the proportion of cumulative positive cases in the same area, which was  
308 directly obtained from the individual patient data.

309

### 310 **3.2. Daily variation of SARS-CoV-2 RNA load in the metropolitan area of A** 311 **Coruña and hospital**

312 The evolution of the viral load along the day both at the A Coruña metropolitan area  
313 and at the University Hospital Complex of A Coruña (CHUAC) was monitored in order  
314 to discern which amount of the viral load detected in the WWTP Bens came from the  
315 CHUAC and which from the community. An analysis of the viral load of the 24-h and  
316 2-h samples collected at the WWTP Bens and CHUAC, as reflected in Dataset S1, was  
317 performed. The RT-qPCR results for 24-h samples are included in Dataset S5 and  
318 results for 2-h samples are included in Dataset S6. Because of the small sample size,  
319 nonparametric LOESS models were used in order to prevent the possible overfitting of  
320 alternatives such as GAM. Figure 4 shows the viral load trends at CHUAC (Figure 4A)  
321 and at WWTP Bens (Figure 4B) depending on the hour of the day, during four different  
322 days. Figure 4A shows the hourly trend at CHUAC, with a maximum around 08:00,  
323 whereas the viral load curves at WWTP Bens (Figure 4B) attained a minimum around  
324 05:00 and a maximum between 14:00 and 15:00.

### 325 **3.3. Lockdown de-escalation in the metropolitan area of A Coruña**

326 As expected, the mean viral load decreased with time when measured at CHUAC  
327 (Figure 5A, late April – mid May) and at WWTP Bens (Figure 5B, mid April – early  
328 June) following an asymptotic type trend (fitted using GAM with cubic regression  
329 splines).

330 Time course quantitative detection of SARS-CoV-2 in A Coruña WWTP Bens  
331 wastewater correlated with the estimated number of COVID-19 positive cases, as  
332 shown in Figure 6. The number of copies of viral RNA per liter decreased from around  
333 500,000 to less than 1,000, while the estimated cases of patients infected by SARS-  
334 CoV-2 decreased approximately 6-fold in the same period, reaching in both cases the  
335 lowest levels in the metropolitan area at the beginning of June.

336

### 337 **3.4. Wastewater epidemiological models based on viral load for COVID-19 real** 338 **active cases prediction**

339 Firstly, a correlation analysis (Figure 7) was done finding that estimated number of  
340 COVID-19 positive cases strongly correlated linearly with the logarithm of daily mean  
341 viral load at Bens ( $R=0.923$ ) and with the mean flow ( $R=-0.362$ ). Nonetheless, a strong  
342 inverse linear relationship between estimated COVID-19 positive cases and time was  
343 found ( $R=-0.99$ ).

344

345 Then, different regression models were tested to predict the real number of COVID-19  
346 active cases based on the viral load and the most relevant atmospheric variables. The  
347 best results were obtained using GAM models depending on the viral load and the mean  
348 flow (Figure 8). The effect of the viral load on the COVID-19 estimated active cases  
349 showed a logarithmic shape (Figure 8A), which suggested that the number of COVID-

350 19 real active cases could be modeled linearly as a function of the logarithm of the viral  
351 load. On the other hand, the shape of the effect of the mean flow on the estimated  
352 number of COVID-19 real active cases appears to be quadratic (Figure 8B), but its  
353 confidence band was wide and contained the horizontal line with height zero, which  
354 means that the effect of the mean flow was not significant ( $p$  value=0.142). Therefore,  
355 the only independent variable that was significant was the viral load, with  $R^2=0.86$ .

356

357 Since the nonparametric estimation of the viral load effect had a logarithmic shape, a  
358 multiple linear model was fitted using the logarithmic transformation of the viral load,  
359 daily flow, rainfall, temperature, and humidity. Figure 9 shows the more explicative  
360 models for different number of predictors using the  $R^2$  maximization criterion, finding  
361 that the only significant predictor was the viral load. In fact, when a multivariate linear  
362 model depending on three predictors (viral load, daily flow, and rainfall) was fitted, data  
363 showed that the only significant explanatory variable was the viral load ( $p$   
364 value= $1.32 \cdot 10^{-8}$ ). Table 1 shows that the effect of the other two predictors, daily flow ( $p$   
365 value=0.186525) and rainfall ( $p$  value=0.099239), were not clearly significant.

366

367 Finally, ignoring the rest of the explanatory variables, only the natural logarithm of the  
368 viral load gave a good linear model fit ( $R^2=0.851$ ) that was useful to predict the real  
369 number of active COVID-19 cases (Figure 10A). After removing three outliers, the fit  
370 improved slightly ( $R^2=0.894$ ), as shown in Figure 10B.

371

372 The final fitted linear model became:

373

374 
$$Y = - 7079 + 1059 \cdot \log X$$

375 where  $Y$  denotes the real number of active COVID-19 cases,  $X$  is the viral load (number  
376 of RNA copies per L) and  $\log$  stands for the natural logarithm.

377

378 For instance, a viral load of  $Y = 150,000$  copies per liter would lead to an estimated  
379 number of  $X = 5,543$  active cases.

380

381 The prediction ability of this fitted linear model, the GAM, and the linear and quadratic  
382 LOESS models has been evaluated using a 6-fold cross validation procedure, to prevent  
383 overfitting. In all cases, the response variable was the estimated number of real COVID-  
384 19 active cases in the metropolitan area (Figure 2), and the explanatory variable, the  
385 natural logarithm of the viral load. Table 2 shows the corresponding prediction  $R^2$  for  
386 each one of the four models, along with the root mean squared prediction error  
387 (RMSPE). The smaller this error, the better the predictive ability of the model was. All  
388 the models provided quite accurate predictions for the real number of COVID-19 active  
389 cases using the viral load, with an error of around 10% of the response range. The  
390 model with the lowest prediction error, 9.5%, was the quadratic LOESS model. Flexible  
391 models, such as LOESS and GAM, slightly improved the predictive performance when  
392 compared with the linear model, which has a prediction error of around 11.4% of the  
393 response range. The quadratic LOESS model was also the one with the largest value for  
394  $R^2$ . Therefore, it provided the best predictive results.

395 Figure 11A shows a scatter plot of the estimated number of COVID-19 active cases in  
396 the metropolitan area versus the natural logarithm of the viral load, along with the  
397 quadratic LOESS fitted curve. Figure 11B displays the actual and predicted values of  
398 real number of COVID-19 active cases. The diagonal line was added to compare with  
399 the perfect model prediction.



#### 400 **4. DISCUSSION**

401

402 On March 9<sup>th</sup> 2020, the city of A Coruña, in the region of Galicia, reported the  
403 circulation of SARS-CoV-2 for the first time, with data of a COVID-19 outbreak in a  
404 civic center that affected 11 people, as well as data on a few more dispersed cases. At  
405 that point, a surveillance phase on approximately 250 people began, and the  
406 recommendations from the Health Department on cleaning and mobility restrictions  
407 were followed (GCiencia 2020a). During these initial days of the COVID-19 epidemic  
408 in Galicia, most of the cases were in the municipality of A Coruña. Thus, at noon on  
409 March 13<sup>th</sup>, the Xunta de Galicia (Government of the Autonomous Community of  
410 Galicia) reported 90 confirmed cases of COVID-19 in Galicia, 43 of them in the A  
411 Coruña area (GCiencia 2020b). The Spanish Government declared a state of alarm on  
412 March 14<sup>th</sup> throughout the country, at which point the Galician community still had few  
413 cases. Despite this, in a few days the region went from a monitored and controlled  
414 situation to an exponential growth of cases (Rey 2020), reaching a peak of 1667 active  
415 cases. The cases were distributed in an area that covers the municipalities of A Coruña  
416 and Cee, as shown by the data provided by SERGAS (Galician Health Service) in  
417 [https://www.datawrapper.de/\\_/QrkrZ](https://www.datawrapper.de/_/QrkrZ). This area does not coincide with the area that  
418 discharges its wastewater into the WWTP Bens, which serves the municipalities of A  
419 Coruña, Oleiros, Cambre, Culleredo, and Arteixo, but the figures give an idea of the  
420 magnitude of the epidemic at that stage. In this context, an exploratory sampling and  
421 analysis was carried out on April 15<sup>th</sup>, which showed the presence of viral genetic  
422 material in the wastewater of the WWTP Bens. From April 19<sup>th</sup>, the 24-hour composite  
423 samples were continuously analyzed until early June for this study, although  
424 surveillance has continued and will continue at WWTP Bens until the virus disappears.

425

426 The data from wastewater obtained from April 19<sup>th</sup> onwards has confirmed the decrease  
427 in COVID-19 incidence. We showed that time course quantitative detection of SARS-  
428 CoV-2 in wastewater from WWTP Bens correlated with COVID-19 confirmed cases,  
429 which backs up the plausibility of our approach. Moreover, the seroprevalence studies  
430 carried out by the Spanish Centre for Epidemiology showed that cases in A Coruña  
431 represented about 1.8 % of the local population. This means that, for a population of  
432 about 369,098 inhabitants, the number of people infected with SARS-CoV-2  
433 contributing their sewage into the WWTP Bens would be around 6,644, which includes  
434 people with symptoms and those who are asymptomatic. Considering that the ratio  
435 between people with symptoms (reported by the health service) and the total infected  
436 population (including asymptomatic people) is estimated to be 1:4, we calculated that  
437 reported cases contributing their wastewater into WWTP Bens would be around 1,661,  
438 which is close to the maximum number of cases reported in the A Coruña-Cee area  
439 (1,667 cases on April 28<sup>th</sup>). It must be noted that the criteria used by the authorities to  
440 report cases varied over time, so this may explain the gap between the graphs reported  
441 in the media throughout the epidemic and our Figure 6, where both a decrease in the  
442 viral load and in the estimated COVID-19 cases can be observed from mid April to  
443 early June.

444 However, the level of the curve at WWTP Bens at the beginning of May was much  
445 higher than that corresponding to May 11<sup>th</sup>. This is due to the effectiveness of the  
446 lockdown measures applied in Spain. The May 12<sup>th</sup> daily curve at CHUAC showed a  
447 higher viral load than the one corresponding to May 11<sup>th</sup> at WWTP Bens, showing the  
448 viral load measured at the hospital tends to be higher than at WWTP Bens due to a  
449 lower dilution effect, as expected.

450 In the present work, nonparametric and even simple parametric regression models have  
451 been shown to be useful tools to construct prediction models for the real number of  
452 COVID-19 active cases as a function of the viral load. This is a pioneering approach in  
453 the context of the SARS-CoV-2 pandemic since, to our knowledge, WBE studies  
454 available are still limited to reporting the occurrence of SARS-CoV-2 RNA in WWTPs  
455 and sewer networks, in order to establish a direct comparison with declared COVID-19  
456 cases (Randazzo et al. 2020a, Medema et al. 2020, Nemudryi et al. 2020, La Rosa et al.  
457 2020, Randazzo et al. 2020b, Polo et al. 2020). The only precedent combines  
458 computational analysis and modeling with a theoretical approach in order to identify  
459 useful variables and confirm the feasibility and cost-effectiveness of WBE as a  
460 prediction tool (Hart and Halden 2020). Other examples of WBE models have been  
461 applied to previous outbreaks of other infectious diseases. For example, during a polio  
462 outbreak detected in Israel in 2013-2014, a disease transmission model was optimized  
463 incorporating environmental data (Brouwer et al. 2018). Given the availability of  
464 clinical information on poliovirus, the developed infectious disease model incorporated  
465 fully validated parameters such as the transmission and vaccination rates, leading to  
466 accurate estimations of incidence. This type of study highlights one of the main  
467 challenges we have faced developing our model: the SARS-CoV-2 novelty and the  
468 associated scarcity of epidemiologic information. Considering this, our statistical model  
469 has minimized the uncertainty implementing a complete set of hydraulic information  
470 from the sewer network of the city of A Coruña, available thanks of a joint effort from  
471 different local authorities. This *ad hoc* model can be adapted to other scenarios as long  
472 as similar hydraulic information can be obtained from the area where it will be used.  
473

474 Other possible explanatory variables (such as rainfall or the mean flow) did not enter  
475 the model. Although this is a bit counterintuitive (dilution should affect the viral load  
476 measured), it is important to point out that rainfall fluctuated little during the data  
477 collection period mid April – early June: its median was 0, its mean was 2.88 L/m<sup>2</sup> and  
478 its standard deviation was 6.59 L/m<sup>2</sup>.

479

480 Therefore, as a consequence of the results of the GAM fit, a simple linear model was  
481 considered to fit the estimated number of COVID-19 active cases as a function of the  
482 logarithm of the viral load. The percentage of variability explained by the model was  
483 reasonably high (85.1%) increasing up to 89.4% when three outliers detected were  
484 excluded. Alternative, more flexible models, such as GAM and LOESS, were also  
485 fitted. They produced slightly better results in terms of R<sup>2</sup> and RMSPE. The quadratic  
486 LOESS model avoided overfitting and showed a good predictive ability (R<sup>2</sup>=0.88,  
487 RMSPE=478), the best among all the considered models. However, similar results were  
488 found for the linear model that also brings the advantage of simplicity. Therefore, both  
489 models, linear and LOESS quadratic, could be successfully used to predict the number  
490 of infected people in a given region based on viral load data obtained from wastewater.

491

492 Our models, as described, are only applicable to the metropolitan area of A Coruña, the  
493 region for which they have been developed, although can be adapted to any other  
494 location. This area has Atlantic weather and it may rain substantially in autumn and  
495 winter, which could lead to explanatory variables such as rainfall and/or mean flow  
496 becoming significant for those seasons and needing to enter the prediction model. Thus,  
497 when applying these models to the same location but in seasons with different climatic  
498 behavior, they might need to be reformulated. In addition, the methodology used to

499 build these statistical models could be used at other locations for epidemiological  
500 COVID-19 outbreak detection, or even for other epidemic outbreaks caused by other  
501 microorganisms. Of course, in that case a detailed data analysis would have to be  
502 carried out as well, since specific features of the sewage network or the climate may  
503 affect the model itself.

504

## 505 **5. CONCLUSIONS**

506 To the best of our knowledge, these are the first highly reliable wastewater-based  
507 epidemiological statistical models useful for tracking COVID-19 epidemic that could be  
508 adapted for use anywhere in the world. These models allow the actual number of  
509 infected patients to be determined with around 90% reliability, since it takes into  
510 account the entire population, whether symptomatic or asymptomatic. These statistical  
511 models can estimate the real magnitude of the epidemic at a specific location and their  
512 cost-effectiveness and speed of sampling can help to early alert health authorities about  
513 potential new outbreaks, thereby helping to protect the local population.

514

## 515 **6. ACKNOWLEDGEMENTS**

516

517 Authors would like to give special thanks to the Board of Directors from EDAR Bens.  
518 Also, we would like to thank Fernanda Rodríguez from the Research Support Services  
519 (SAI) at the University of A Coruña, Laura Larriba, from SERGAS, who helped in  
520 samples and data collection in CHUAC, Francisco Pérez, Javier Fernández and Cristina  
521 Rodríguez from Cadaqua, for their help in sample collection at WWTP Bens, Andrés  
522 Paz-Ares and Xurxo Hervada, from SERGAS, who provided the anonymized patient  
523 database, Amalia Jácome, Ana López-Cheda, Rebeca Peláez and Wende Safari, from

524 CITIC at UDC, who processed that database to produce the epidemiological series at  
525 the municipality level, and Fiona Veira McTiernan, for editing. Finally, we would like  
526 to acknowledge the NORMAN European Network for ‘Collaboration in the time of  
527 Covid19’.

528

## 529 **FUNDING**

530

531 This work was supported by EDAR Bens S.A., A Coruña, Spain [grant number  
532 INV04020 to MP], the National Plan for Scientific Research, Development and  
533 Technological Innovation 2013-2016 funded by the ISCIII, Spain - General  
534 Subdirection of Assessment and Promotion of the Research-European Regional  
535 Development Fund (FEDER) “A way of making Europe” [grant numbers PI15/00860 to  
536 GB and PI17/01482 to MP], the GAIN, Xunta de Galicia, Spain [grant number IN607A  
537 2016/22 to GB, ED431C-2016/015 and ED431C-2020/14 to RC, ED431C 2017/58 to  
538 SL, ED431G 2019/01 to RC and SL, and ED431C 2017/66 to MCV], MINECO, Spain  
539 [grant number MTM2017-82724-R to RC], the Spanish Network for Research in  
540 Infectious Diseases [REIPI RD16/0016/006 to GB]. The work was also supported by  
541 the European Virus Archive Global (EVA-GLOBAL) project that has received funding  
542 from the European Union’s Horizon 2020 research and innovation program under grant  
543 agreement No 871029. SR-F was financially supported by REIPI RD16/0016/006, KC-  
544 P by IN607A 2016/22 and the Spanish Association against Cancer (AECC) and JAV by  
545 IN607A 2016/22.

546

547

548 **AUTHOR CONTRIBUTIONS**

549

550 MP, RC, CL, JAV, JT-S and RR conceived and designed the study. JAV, SR-F, MN  
551 and KC-P performed wastewater processing and viral analysis, AL-O and JT-S  
552 performed statistical models and data analysis, SL managed and analyzed data, BKR-J  
553 assisted in the study design and analysis, AA assessed in data collection, AC supervised  
554 the wastewater analysis, MCV assessed in wastewater sampling, GB and MP supervised  
555 the microbiology team, MP, JAV, RC, RR and JT-S wrote the manuscript. MP and RC  
556 supervised the team and coordinated all tasks.

557

558 **COMPETING INTERESTS**

559 The authors declare that they have no known competing financial interests or personal  
560 relationships that could have appeared to influence the work reported in this paper.

561

562 **DATA AVAILABILITY**

563 The authors declare that all data supporting the findings of this study are available  
564 within the article and Supplementary Information files, and also are available from the  
565 corresponding authors on reasonable request.

566

567

568

569

570

571

572 **REFERENCES**

573

574 Ahmed, W., Angel, N., Edson, J., Bibby, K., Bivins, A., O'Brien, J.W., Choi,  
575 P.M., Kitajima, M., Simpson, S.L., Li, J., Tschärke, B., Verhagen, R., Smith, W.J.M.,  
576 Zaugg, J., Dierens, L., Hugenholtz, P., Thomas, K.V. and Mueller, J.F. (2020) First  
577 confirmed detection of SARS-CoV-2 in untreated wastewater in Australia: A proof of  
578 concept for the wastewater surveillance of COVID-19 in the community. *Science of the*  
579 *Total Environ* 728, 138764. <https://doi.org/10.1016/j.scitotenv.2020.138764>

580 Balboa, S., Mauricio-Iglesias, M., Rodríguez, S., Martínez-Lamas, L., Vasallo,  
581 F.J., Rigueiro, B. and Lema, J.M. (2020) The fate of SARS-CoV-2 in wastewater  
582 treatment plants points out the sludge line as a suitable spot for incidence monitoring.  
583 medRxiv, 2020.2005.2025.20112706. <https://doi.org/10.1101/2020.05.25.20112706>

584 Bi, Q., Wu, Y., Mei, S., Ye, C., Zou, X., Zhang, Z., Liu, X., Wei, L., Truelove,  
585 S.A., Zhang, T., Gao, W., Cheng, C., Tang, X., Wu, X., Wu, Y., Sun, B., Huang, S.,  
586 Sun, Y., Zhang, J., Ma, T., Lessler, J. and Feng, T. (2020) Epidemiology and  
587 transmission of COVID-19 in 391 cases and 1286 of their close contacts in Shenzhen,  
588 China: a retrospective cohort study. *The Lancet Infectious Diseases* 20(8), 911-919.  
589 [https://doi.org/10.1016/S1473-3099\(20\)30287-5](https://doi.org/10.1016/S1473-3099(20)30287-5)

590 Brouwer, A.F., Eisenberg, J.N.S., Pomeroy, C.D., Shulman, L.M., Hindiyeh, M.,  
591 Manor, Y., Grotto, I., Koopman, J.S. and Eisenberg, M.C. (2018) Epidemiology of the  
592 silent polio outbreak in Rahat, Israel, based on modeling of environmental surveillance  
593 data. *Proceedings of the National Academy of Sciences of the United States of America*  
594 115(45), E10625-e10633. <https://doi.org/10.1073/pnas.1808798115>

595 Chen, Y., Chen, L., Deng, Q., Zhang, G., Wu, K., Ni, L., Yang, Y., Liu, B.,  
596 Wang, W., Wei, C., Yang, J., Ye, G. and Cheng, Z. (2020) The presence of SARS-CoV-



597 2 RNA in the feces of COVID-19 patients. *Journal of Medical Virology* 92(7), 833-  
598 840. <https://doi.org/10.1002/jmv.25825>

599 Cleveland, W.S. (1979) Robust Locally Weighted Regression and Smoothing  
600 Scatterplots. *Journal of the American Statistical Association* 74(368), 829-836. <https://doi.org/10.1080/01621459.1979.10501331>

601 Croft, T.L., Huffines, R.A., Pathak, M. and Subedi, B. (2020) Prevalence of  
602 illicit and prescribed neuropsychiatric drugs in three communities in Kentucky using  
603 wastewater-based epidemiology and Monte Carlo simulation for the estimation of  
604 associated uncertainties. *Journal of Hazardous Materials* 384, 121306.  
605 <https://doi.org/10.1016/j.jhazmat.2019.121306>

606 Day, M. (2020) Covid-19: four fifths of cases are asymptomatic, China figures  
607 indicate. *The British Medical Journal* 369, m1375. <https://doi.org/10.1136/bmj.m1375>

608 Ehlers, M.M., Grabow, W.O. and Pavlov, D.N. (2005) Detection of  
609 enteroviruses in untreated and treated drinking water supplies in South Africa. *Water*  
610 *Research* 39(11), 2253-2258. <https://doi.org/10.1016/j.watres.2005.04.014>

611 EMCDDA (2020) Perspectives on drugs. Wastewater analysis and drugs: a  
612 European multi-city study. [https://www.emcdda.europa.eu/topics/pods/waste-water-](https://www.emcdda.europa.eu/topics/pods/waste-water-analysis)  
613 [analysis](https://www.emcdda.europa.eu/topics/pods/waste-water-analysis)

614 Enders, C.K. (2010) *Applied missing data analysis*, Guilford Press, New York,  
615 NY, US.

616 GCiencia (2020a) The outbreak of the civic center of A Coruña accumulates 11  
617 cases of coronavirus (O foco do centro cívico da Coruña suma xa 11 casos de  
618 coronavirus). <https://www.gciencia.com/saude/centro-civico-coruna-coronavirus/>

619 Gciencia (2020b) Galicia acumulates 90 cases of SARS-CoV-2 (Galicia suma  
620 90 casos de SARS-CoV-2). [https://www.gciencia.com/extra/galicia-incidencia-casos-](https://www.gciencia.com/extra/galicia-incidencia-casos-coronavirus/)  
621 [coronavirus/](https://www.gciencia.com/extra/galicia-incidencia-casos-coronavirus/)

- 621           Goulding, N. and Hickman, M. (2020) A comparison of trends in wastewater-  
622 based data and traditional epidemiological indicators of stimulant consumption in three  
623 locations. *Addiction* 115(3), 462-472. <https://doi.org/10.1111/add.14852>
- 624           Gupta, S., Parker, J., Smits, S., Underwood, J. and Dolwani, S. (2020) Persistent  
625 viral shedding of SARS-CoV-2 in faeces - a rapid review. *Colorectal Disease* 22(6),  
626 611-620. <https://doi.org/10.1111/codi.15138>
- 627           Hart, O.E. and Halden, R.U. (2020) Computational analysis of SARS-CoV-  
628 2/COVID-19 surveillance by wastewater-based epidemiology locally and globally:  
629 Feasibility, economy, opportunities and challenges. *Science of the Total Environment*  
630 730, 138875. <https://doi.org/10.1016/j.scitotenv.2020.138875>
- 631           Hastie, T. and Tibshirani, R. (1990) *Generalized Additive Models*, Chapman  
632 and Hall. <https://doi.org/10.1002/sim.4780110717>
- 633           Hellmér, M., Paxéus, N., Magnus, L., Enache, L., Arnholm, B., Johansson, A.,  
634 Bergström, T. and Norder, H. (2014) Detection of pathogenic viruses in sewage  
635 provided early warnings of hepatitis A virus and norovirus outbreaks. *Applied and*  
636 *Environmental Microbiology* 80(21), 6771-6781. <https://doi.org/10.1128/AEM.01981-14>
- 637           Hovi, T., Shulman, L.M., van der Avoort, H., Deshpande, J., Roivainen, M. and  
638 EM, D.E.G. (2012) Role of environmental poliovirus surveillance in global polio  
639 eradication and beyond. *Epidemiology & Infection* 140(1), 1-13.  
640 <https://doi.org/10.1017/S095026881000316X>
- 641           La Rosa, G., Iaconelli, M., Mancini, P., Bonanno Ferraro, G., Veneri, C.,  
642 Bonadonna, L., Lucentini, L. and Suffredini, E. (2020) First detection of SARS-CoV-2  
643 in untreated wastewaters in Italy. *Science of Total Environment* 736, 139652.  
644 <https://doi.org/10.1016/j.scitotenv.2020.139652>

645 Lizasoain, A., Tort, L.F.L., García, M., Gillman, L., Alberti, A., Leite, J.P.G.,  
646 Miagostovich, M.P., Pou, S.A., Caglio, A., Raszap, A., Huertas, J., Berois, M.,  
647 Victoria, M. and Colina, R. (2018) Human enteric viruses in a wastewater treatment  
648 plant: evaluation of activated sludge combined with UV disinfection process reveals  
649 different removal performances for viruses with different features. *Letters in Applied*  
650 *Microbiology* 66(3), 215-221. <https://doi.org/10.1111/lam.12839>

651 Lodder, W. and de Roda Husman, A.M. (2020) SARS-CoV-2 in wastewater:  
652 potential health risk, but also data source. *The Lancet Gastroenterology Hepatology*  
653 5(6), 533-534. [https://doi.org/10.1016/S2468-1253\(20\)30087-X](https://doi.org/10.1016/S2468-1253(20)30087-X)

654 Mancini, P., Bonanno Ferraro, G., Iaconelli, M. and Suffredini, E. (2019)  
655 Molecular characterization of human Sapovirus in untreated sewage in Italy by  
656 amplicon-based Sanger and next-generation sequencing. *Journal of Applied*  
657 *Microbiology* 126(1), 324-331. <https://doi.org/10.1111/jam.14129>

658 Medema, G., Heijnen, L., Elsinga, G., Italiaander, R. and Brouwer, A. (2020)  
659 Presence of SARS-Coronavirus-2 RNA in Sewage and Correlation with Reported  
660 COVID-19 Prevalence in the Early Stage of the Epidemic in The Netherlands.  
661 *Environmental Science & Technology Letters* 7(7), 511-516.  
662 <https://doi.org/10.1021/acs.estlett.0c00357>

663 Nemudryi, A., Nemudraia, A., Wiegand, T., Surya, K., Buyukyoruk, M., Cicha,  
664 C., Vanderwood, K.K., Wilkinson, R. and Wiedenheft, B. (2020) Temporal Detection  
665 and Phylogenetic Assessment of SARS-CoV-2 in Municipal Wastewater. *Cell Reports*  
666 *Medicine* 1(6), 100098. <https://doi.org/10.1016/j.xcrm.2020.100098>

667 Peccia, J., Zulli, A., Brackney, D.E., Grubaugh, N.D., Kaplan, E.H., Casanovas-  
668 Massana, A., Ko, A.I., Malik, A.A., Wang, D., Wang, M., Warren, J.L., Weinberger,  
669 D.M., Arnold, W. and Omer, S.B. (2020) Measurement of SARS-CoV-2 RNA in

670 wastewater tracks community infection dynamics. *Nature Biotechnology* 38(10), 1164-  
671 1167. [https://10.1038/s41587-020-0684-z](https://doi.org/10.1038/s41587-020-0684-z)

672 Pollán, M., Pérez-Gómez, B., Pastor-Barriuso, R., Oteo, J., Hernán, M.A.,  
673 Pérez-Olmeda, M., Sanmartín, J.L., Fernández-García, A., Cruz, I., Fernández de  
674 Larrea, N., Molina, M., Rodríguez-Cabrera, F., Martín, M., Merino-Amador, P., León  
675 Paniagua, J., Muñoz-Montalvo, J.F., Blanco, F. and Yotti, R. (2020) Prevalence of  
676 SARS-CoV-2 in Spain (ENE-COVID): a nationwide, population-based  
677 seroepidemiological study. *The Lancet* 396(10250), 535-544.  
678 [https://doi.org/10.1016/S0140-6736\(20\)31483-5](https://doi.org/10.1016/S0140-6736(20)31483-5)

679 Polo, D., Quintela-Baluja, M., Corbishley, A., Jones, D.L., Singer, A.C.,  
680 Graham, D.W. and Romalde, J.L. (2020) Making waves: Wastewater-based  
681 epidemiology for COVID-19 - approaches and challenges for surveillance and  
682 prediction. *Water Research* 186, 116404. <https://doi.org/10.1016/j.watres.2020.116404>

683 R Core Team: A language and environment for statistical computing, R  
684 Foundation for Statistical Computing, Vienna, Austria. <https://www.r-project.org/>

685 Randazzo, W., Truchado, P., Cuevas-Ferrando, E., Simón, P., Allende, A. and  
686 Sánchez, G. (2020a) SARS-CoV-2 RNA in wastewater anticipated COVID-19  
687 occurrence in a low prevalence area. *Water Research* 181, 115942.  
688 <https://doi.org/10.1016/j.watres.2020.115942>

689 Randazzo, W., Cuevas-Ferrando, E., Sanjuán, R., Domingo-Calap, P. and  
690 Sánchez, G. (2020b) Metropolitan wastewater analysis for COVID-19 epidemiological  
691 surveillance. *International Journal of Hygiene Environmental Health* 230, 113621.  
692 <https://doi.org/10.1016/j.ijheh.2020.113621>

693           Rey, M. (2020) María José Pereira: "We are ready, but citizen responsibility is  
694 essential" GCiencia [https://www.gciencia.com/saude/maria-jose-pereira-estamos-](https://www.gciencia.com/saude/maria-jose-pereira-estamos-preparados-pero-a-responsabilidade-cidada-sera-esencial/)  
695 [preparados-pero-a-responsabilidade-cidada-sera-esencial/](https://www.gciencia.com/saude/maria-jose-pereira-estamos-preparados-pero-a-responsabilidade-cidada-sera-esencial/)

696           Schloerke, B., Crowley, J., Cook, D., Hofmann, H., Wickham, H., Briatte, F.,  
697 Marbach, M., Thoen, E., Elberg, A., Larmarange, J. and Toomet, O. (2020) GGally:  
698 Extension to 'ggplot2'. <https://ggobi.github.io/ggally/>

699           Wickham, H. (2016) ggplot2: Elegant Graphics for Data Analysis, Springer  
700 International Publishing.

701           Wölfel, R., Corman, V.M., Guggemos, W., Seilmaier, M., Zange, S., Müller,  
702 M.A., Niemeyer, D., Jones, T.C., Vollmar, P., Rothe, C., Hoelscher, M., Bleicker, T.,  
703 Brünink, S., Schneider, J., Ehmann, R., Zwirgmaier, K., Drosten, C. and Wendtner, C.  
704 (2020) Virological assessment of hospitalized patients with COVID-2019. Nature  
705 581(7809), 465-469. [https://10.1038/s41586-020-2196-x](https://doi.org/10.1038/s41586-020-2196-x)

706           Wood, S. (2006) Generalized Additive Models: An Introduction with R, Taylor  
707 & Francis. <https://doi.org/10.1201/9781315370279>

708           Wu, Y., Guo, C., Tang, L., Hong, Z., Zhou, J., Dong, X., Yin, H., Xiao, Q.,  
709 Tang, Y., Qu, X., Kuang, L., Fang, X., Mishra, N., Lu, J., Shan, H., Jiang, G. and  
710 Huang, X. (2020a) Prolonged presence of SARS-CoV-2 viral RNA in faecal samples.  
711 The Lancet Gastroenterology & Hepatology 5(5), 434-435.  
712 [https://doi.org/10.1016/S2468-1253\(20\)30083-2](https://doi.org/10.1016/S2468-1253(20)30083-2)

713           Wu, F., Zhang, J., Xiao, A., Gu, X., Lee, W.L., Armas, F., Kauffman, K.,  
714 Hanage, W., Matus, M., Ghaeli, N., Endo, N., Duvalliet, C., Poyet, M., Moniz, K.,  
715 Washburne, A.D., Erickson, T.B., Chai, P.R., Thompson, J. and Alm, E.J. (2020b)  
716 SARS-CoV-2 Titers in Wastewater Are Higher than Expected from Clinically  
717 Confirmed Cases. mSystems 5(4). [https://10.1128/mSystems.00614-20](https://doi.org/10.1128/mSystems.00614-20)

718           Wurtzer, S., Marechal, V., Mouchel, J.-M., Maday, Y., Teyssou, R., Richard, E.,  
719   Almayrac, J.L. and Moulin, L. (2020) Evaluation of lockdown impact on SARS-CoV-2  
720   dynamics through viral genome quantification in Paris wastewaters. medRxiv,  
721   2020.2004.2012.20062679. <https://doi.org/10.1101/2020.04.12.20062679>

722           Xing, Y.H., Ni, W., Wu, Q., Li, W.J., Li, G.J., Wang, W.D., Tong, J.N., Song,  
723   X.F., Wing-Kin Wong, G. and Xing, Q.S. (2020) Prolonged viral shedding in feces of  
724   pediatric patients with coronavirus disease 2019. *Journal of Microbiology, Immunology*  
725   and *Infection* 53(3), 473-480. <https://doi.org/10.1016/j.jmii.2020.03.021>

726           Xu, Y., Li, X., Zhu, B., Liang, H., Fang, C., Gong, Y., Guo, Q., Sun, X., Zhao,  
727   D., Shen, J. and Zhang, H. (2020) Characteristics of pediatric SARS-CoV-2 infection  
728   and potential evidence for persistent fecal viral shedding. *Nature Medicine* 26(4), 502-  
729   505. <https://10.1038/s41591-020-0817-4>

730           Yang, R., Gui, X. and Xiong, Y. (2020) Comparison of Clinical Characteristics  
731   of Patients with Asymptomatic vs Symptomatic Coronavirus Disease 2019 in Wuhan,  
732   China. *Journal of American Medical Association Network Open* 3(5), e2010182.  
733   <https://10.1001/jamanetworkopen.2020.10182>

734           Zhang, T., Cui, X., Zhao, X., Wang, J., Zheng, J., Zheng, G., Guo, W., Cai, C.  
735   and He, S. (2020) Detectable SARS-CoV-2 viral RNA in feces of three children during  
736   recovery period of COVID-19 pneumonia. *Journal of Medical Virology* 92(7), 909-914.  
737   <https://doi.org/10.1002/jmv.25795>

738  
739  
740  
741

742 Table 1. Signification analysis of the multivariate linear model to explain the number of  
743 active cases as a function of viral load, and mean temperature.

744

|                  | Estimate | Standard error | t value | p-value  |
|------------------|----------|----------------|---------|----------|
| (Intercept)      | -5433.37 | 1805.63        | -3.009  | 0.00562  |
| log (Viral load) | 1008.25  | 107.32         | 9.395   | 5.33e-10 |
| Mean Temperature | -72.66   | 52.97          | -1.372  | 0.18144  |

745

746

747

748 Table 2.  $R^2$  and Root Mean Squared Prediction Error (RMSPE) corresponding to  
749 different regression models explaining the number of real active cases in the  
750 metropolitan area as a function of the natural logarithm of the viral load. RMSPE was  
751 obtained through a 6-fold cross validation procedure.

752

| Model             | $R^2$  | RMSPE  |
|-------------------|--------|--------|
| Linear            | 0.8515 | 581.94 |
| GAM               | 0.8767 | 508.62 |
| LOESS (linear)    | 0.8695 | 487.97 |
| LOESS (quadratic) | 0.8833 | 478.33 |

753

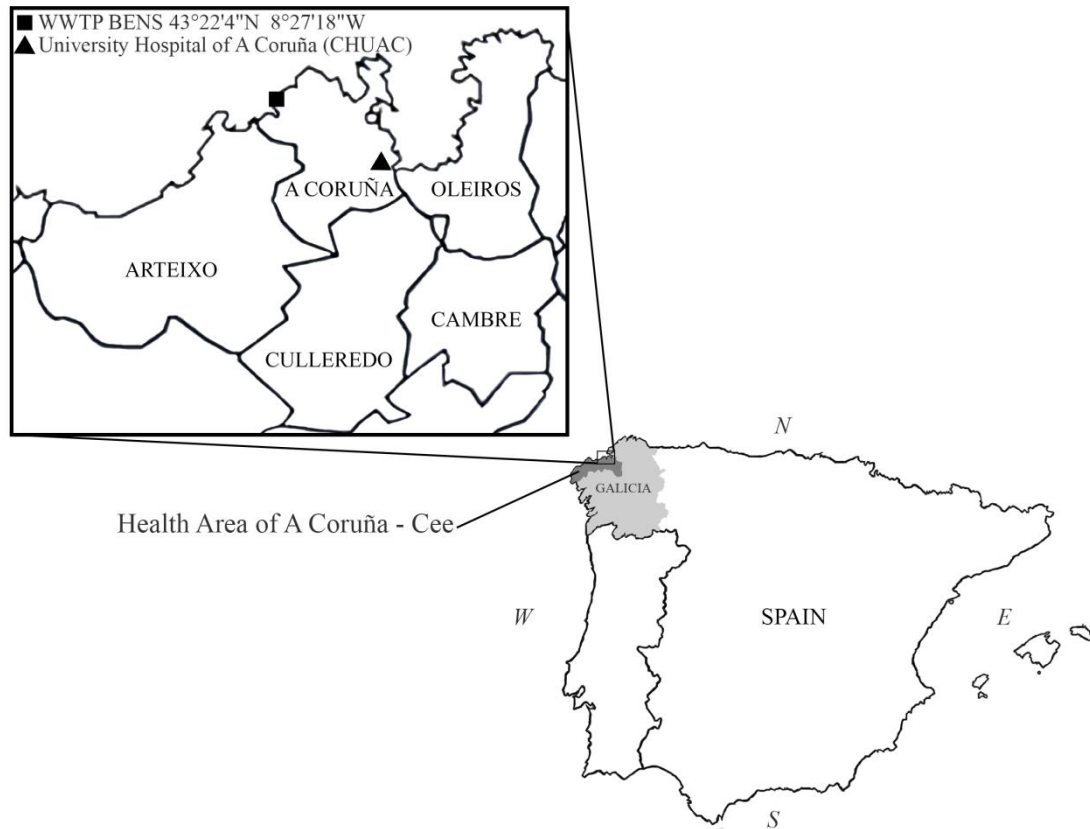

754

755

756

757

758 Figure 1. Map showing the Galician region in Spain, the metropolitan area of A Coruña

759 including Oleiros, Cambre, Culleredo, Arteixo and A Coruña municipalities, and the

760 Health Area of A Coruña-Cee, as well as the specific locations of the University

761 Hospital of A Coruña (CHUAC) and WWTP Bens.

762

763

764

765

766



767

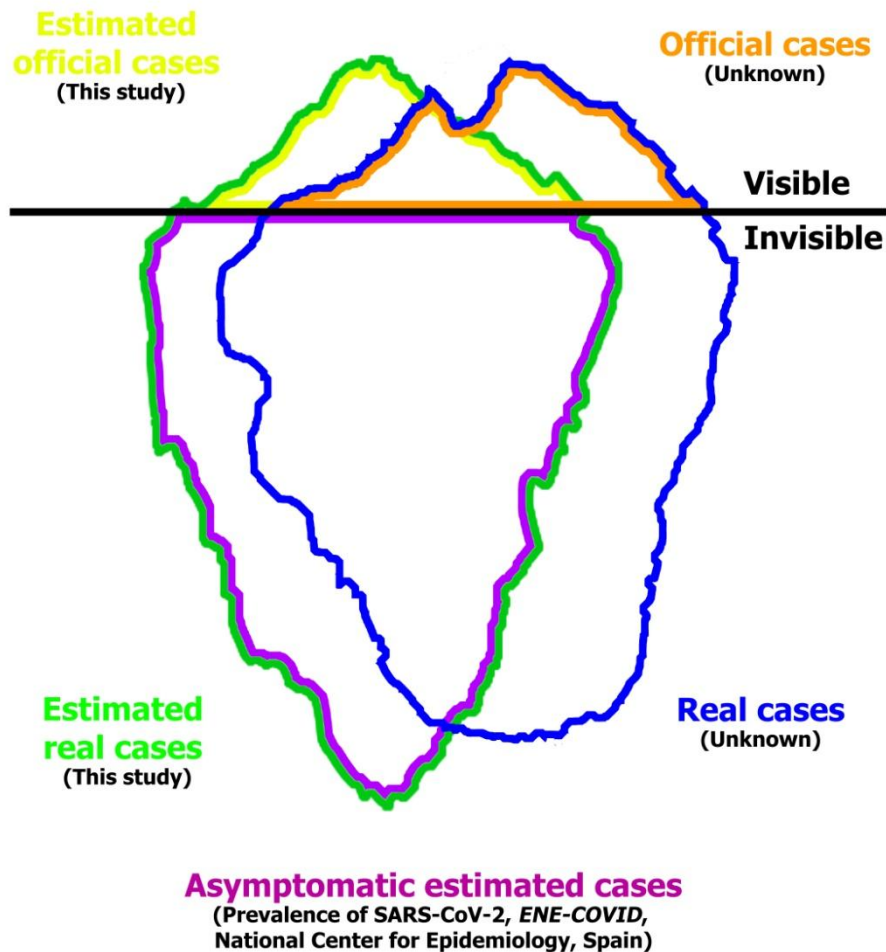

768

769

770 Figure 2. Iceberg representing the overall health of the population of the metropolitan  
771 area of A Coruña infected by SARS-CoV-2, showing the real and official cases  
772 estimated in this study.

773

774

775

776

777

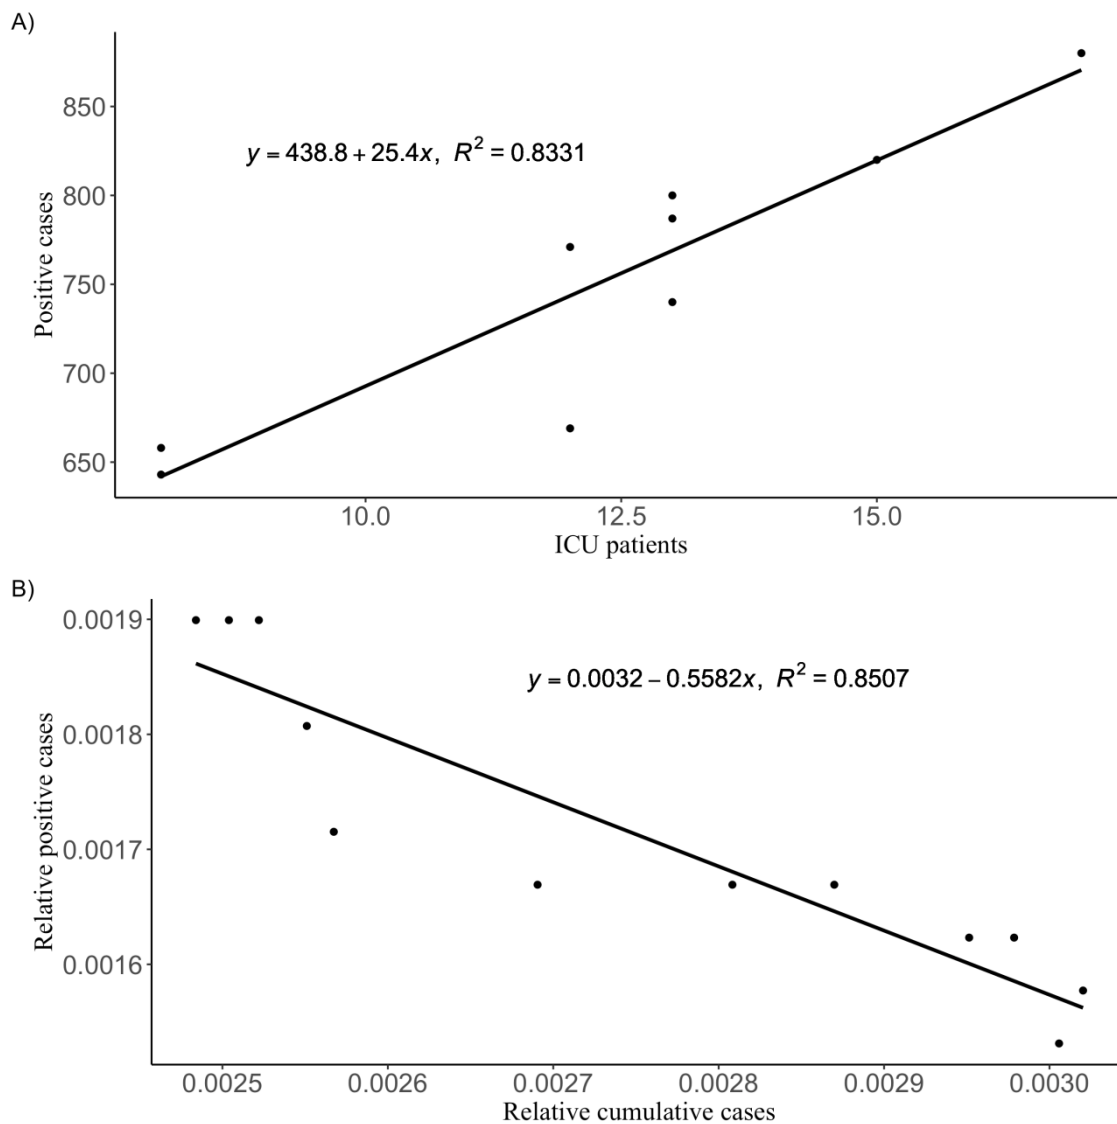

778

779

780 Figure 3. Estimation of the COVID-19 positive cases using simple linear regression

781 models. A) ICU patients versus COVID-19 positive cases in A Coruña – Cee health

782 area, and its linear fit for the period April 29<sup>th</sup> on. B) Relative cumulative cases versus

783 relative positive cases in the health area of A Coruña – Cee and their linear fit.

784

785

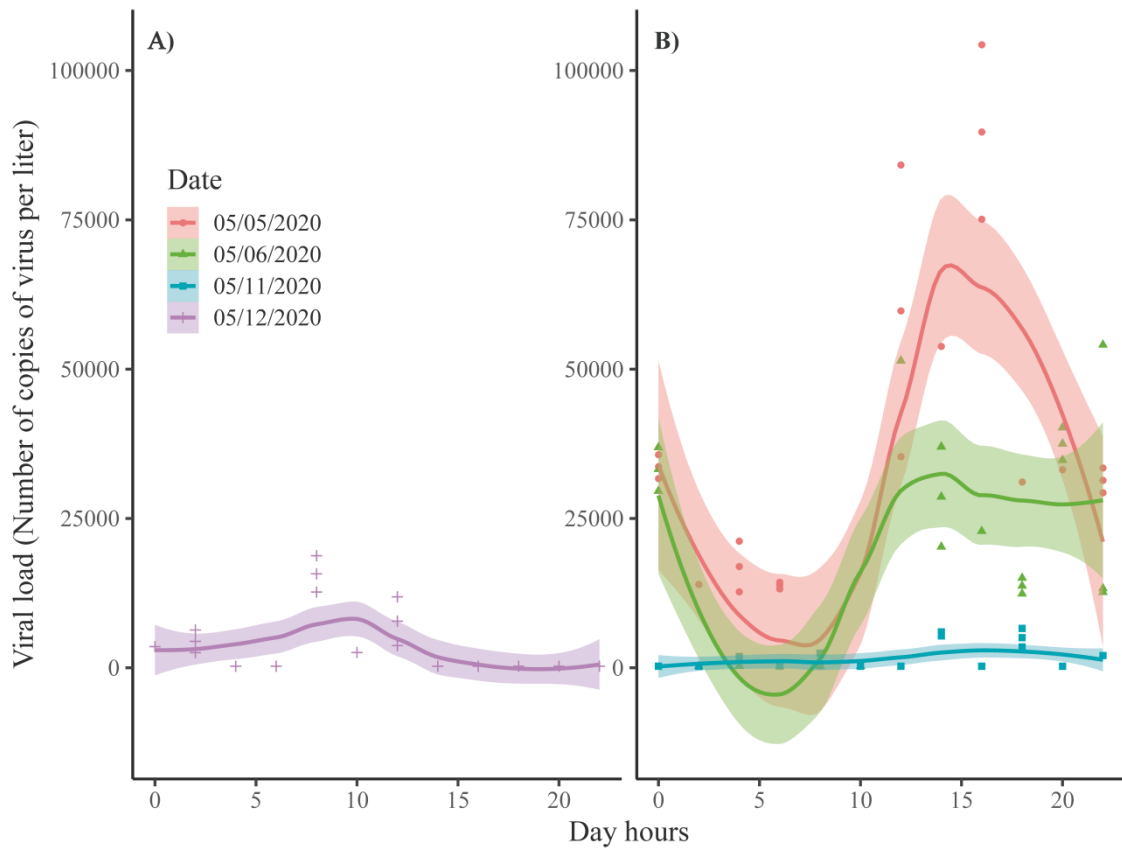

786

787

788

789

790 Figure 4. Viral load trend during the day at CHUAC and Bens. A) Viral load with

791 respect to the hour of the day in CHUAC during the 05/12/2020 and nonparametric

792 LOESS fitted model (span parameter equal to 0.75) with 95% confidence interval. B)

793 Viral load with respect to the hour of the day in Bens for three different days in May,

794 and nonparametric models (span parameter equal to 0.75) with 95% confidence interval

795 fitted to the data of each day separately.

796

797

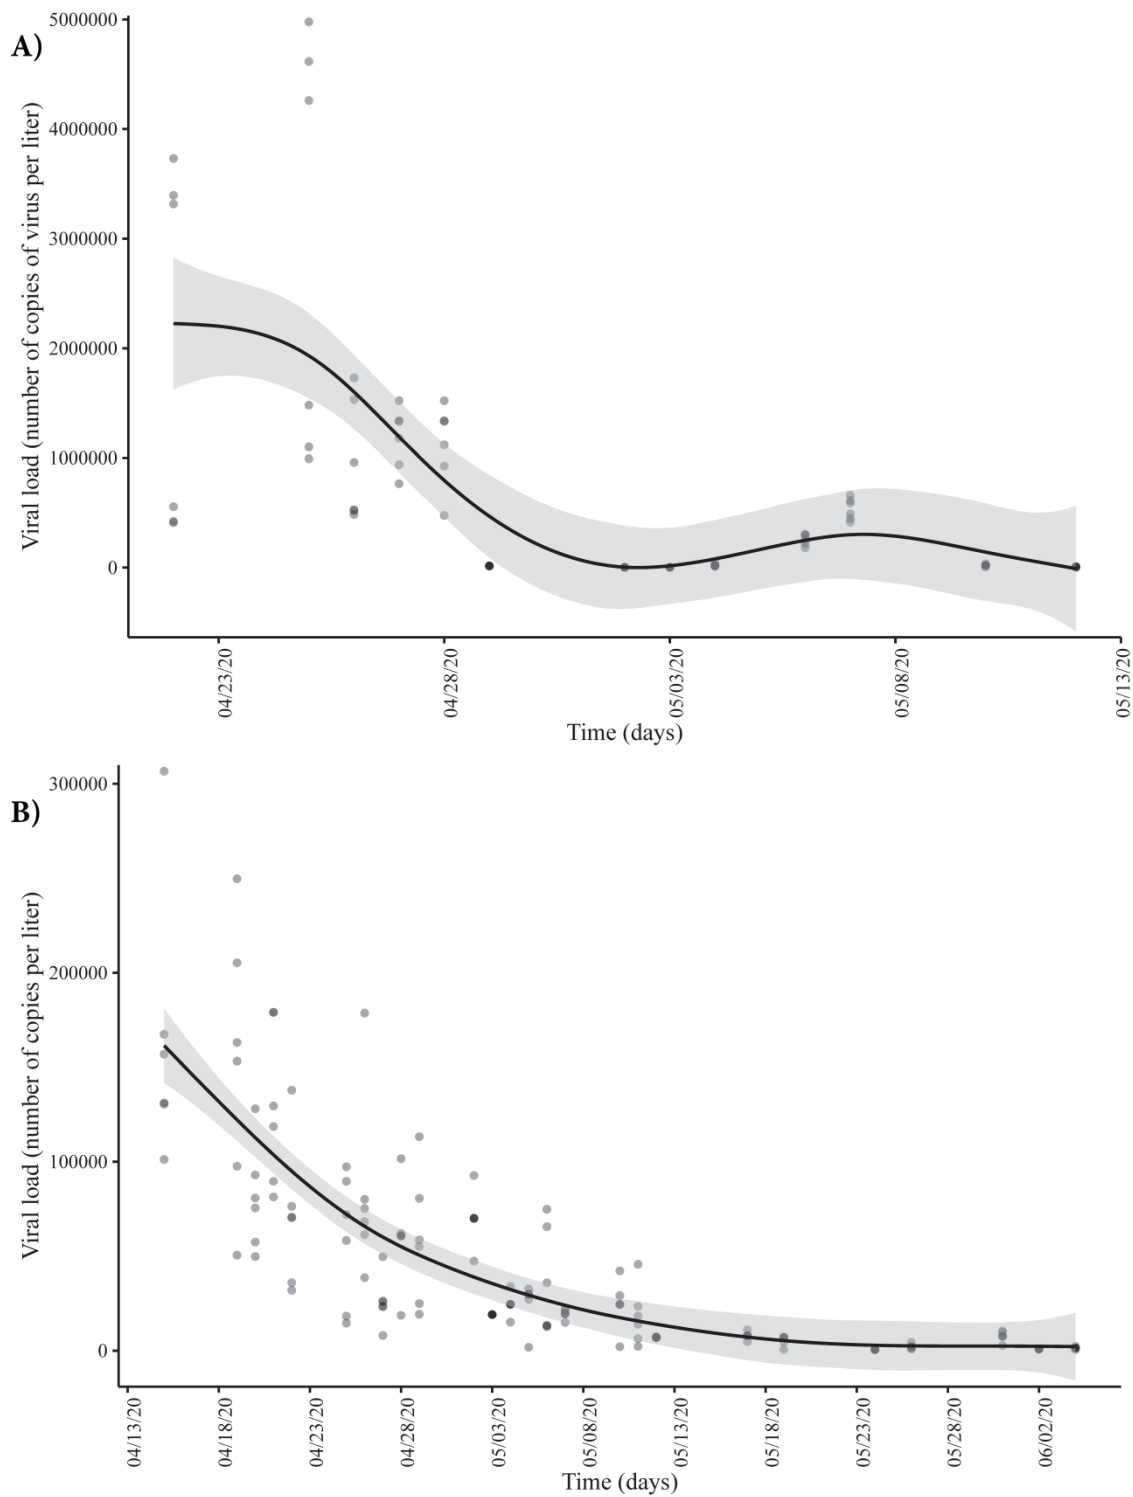

798

799 Figure 5. Date effect in the viral load using a nonparametric estimator (GAM) A) at

800 CHUAC and B) at WWTP Bens.

801

802

803

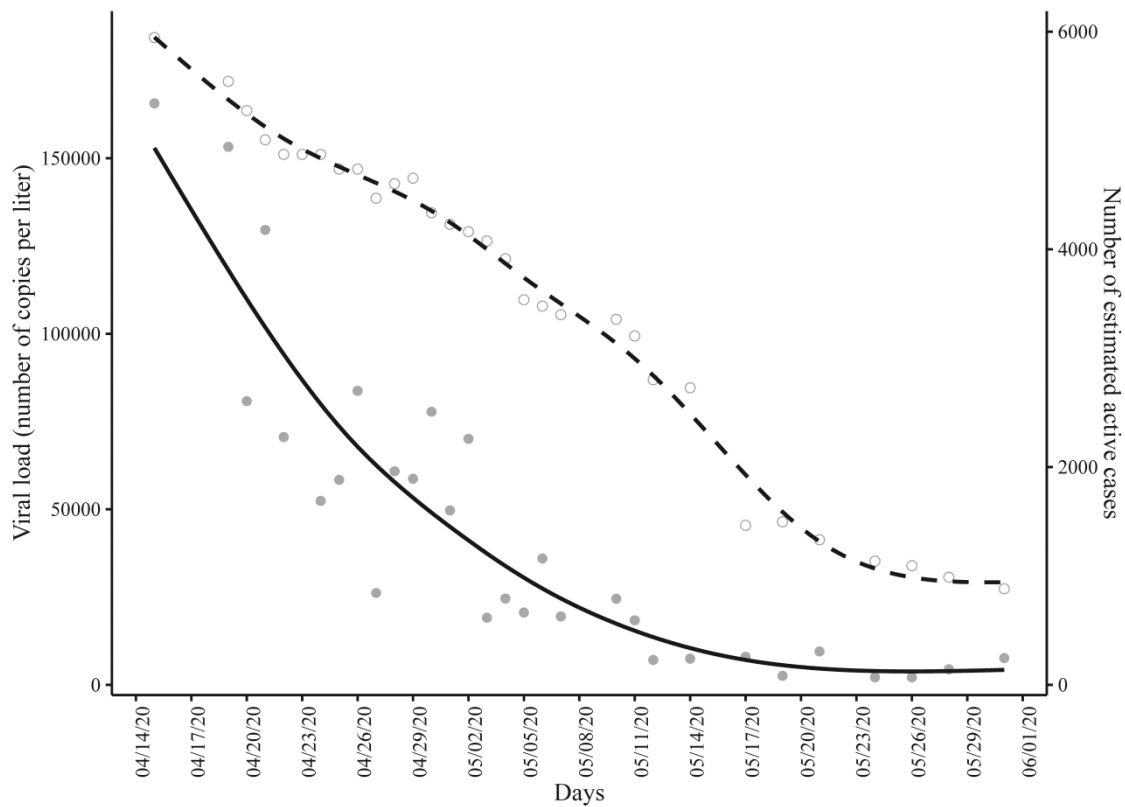

804

805

806 Figure 6. Viral load detected in the influent of the WWTP Bens (solid line) and the  
807 estimated number of COVID-19 positive cases (dashed line) in the metropolitan area of  
808 A Coruña.

809

810

811

812

813

814

815

816

817

818

819

820

821

822

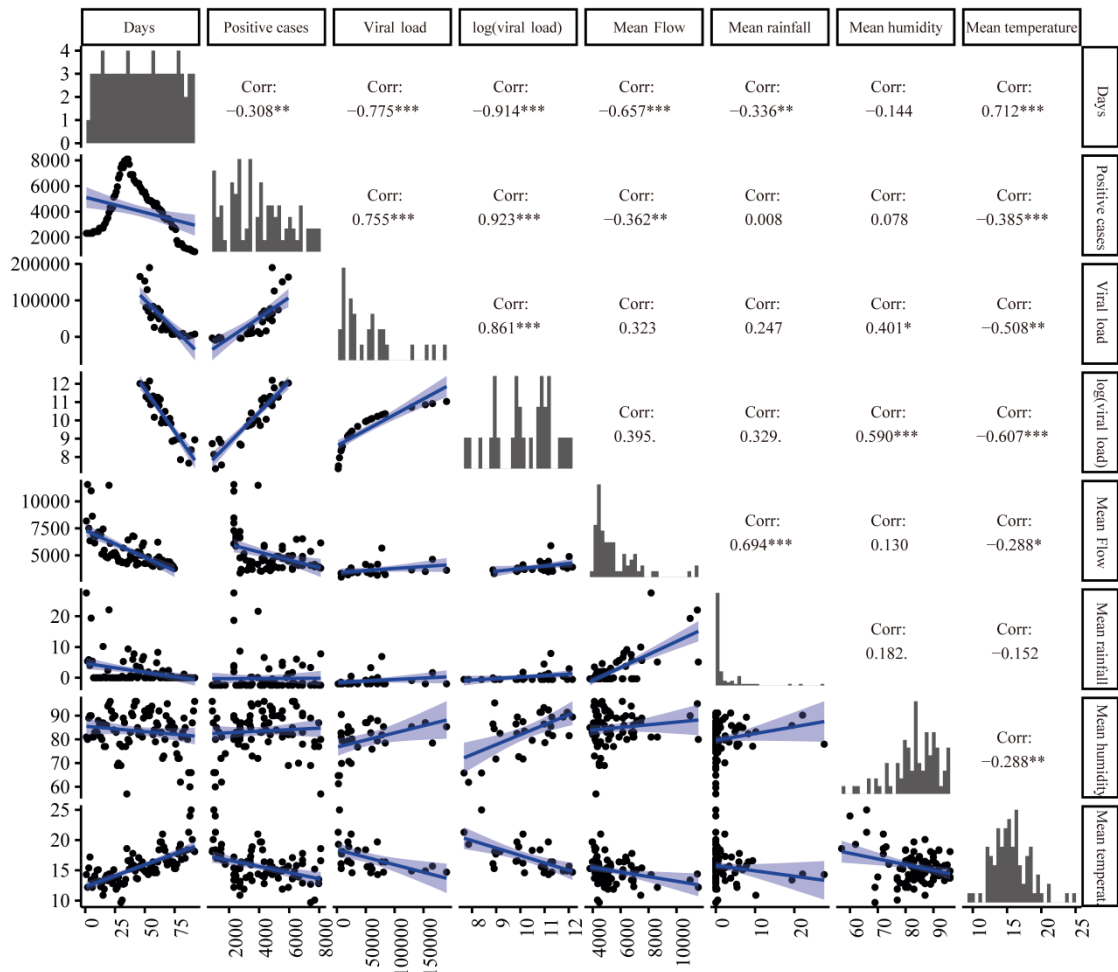

823

824

825 Figure 7. Correlation analysis between estimated COVID-19 positive cases and  
 826 different variables. Scatterplot matrix shows fitted linear models and linear correlation  
 827 coefficients of each pair of variables: time (measured in days from the beginning of  
 828 reported COVID-19 cases), estimated COVID-19 positive cases (positive cases), daily  
 829 mean viral load measured in Bens, mean flow of sewage water in Bens, mean rainfall,  
 830 daily mean humidity and daily mean temperature.

831

832

833

834

835

836

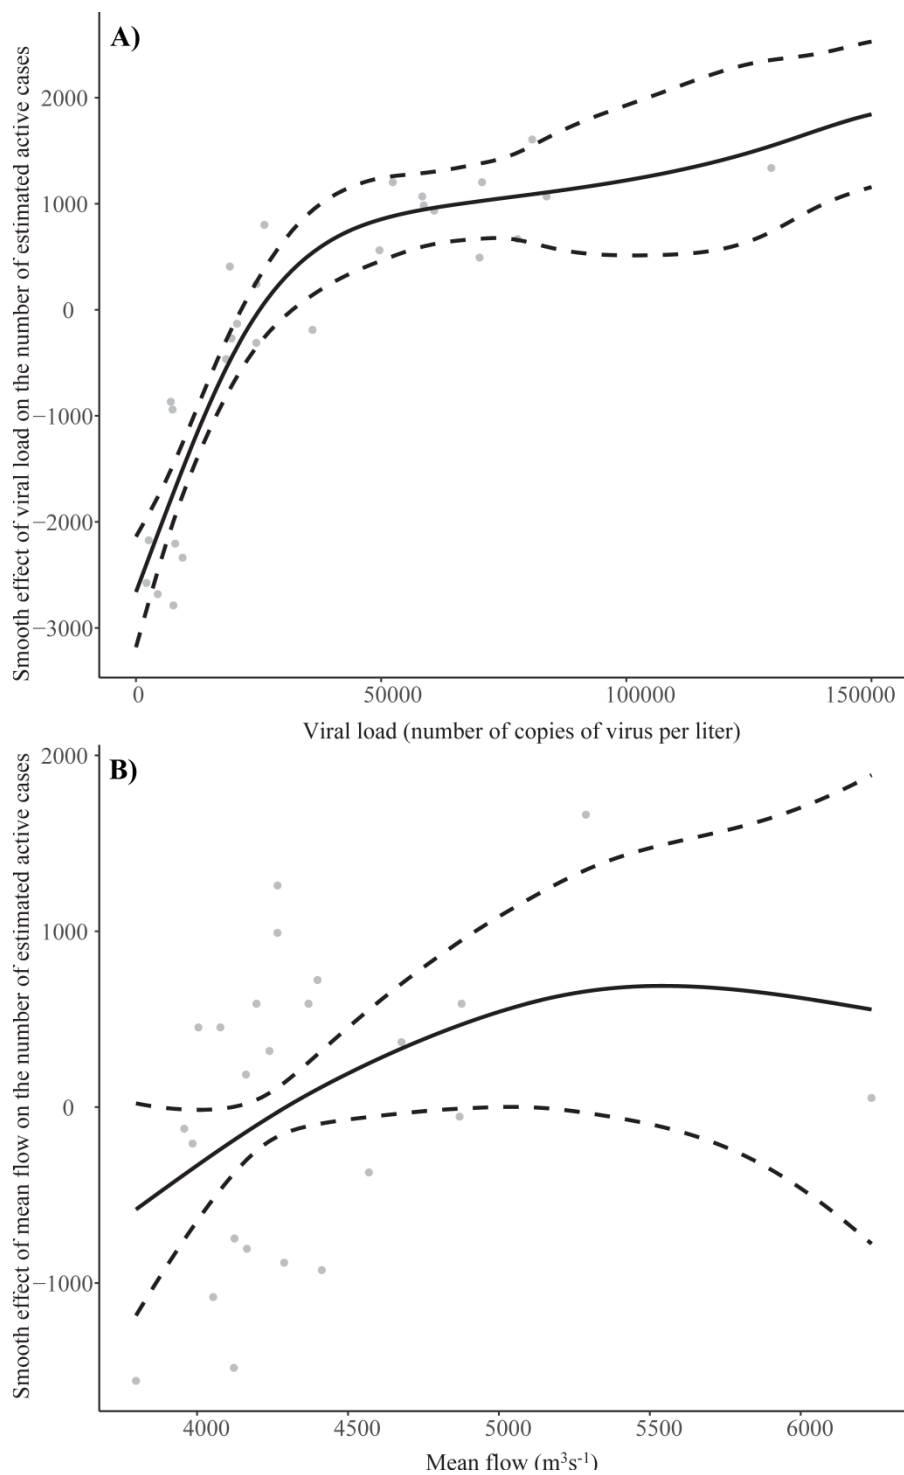

837

838

839

840 Figure 8. Smooth effect (black line) and confidence band (black stripes) for the viral

841 load (A) and for the mean flow (B) on the number of estimated COVID-19 active cases

842 when fitting a GAM.

843

844  
845  
846  
847  
848  
849

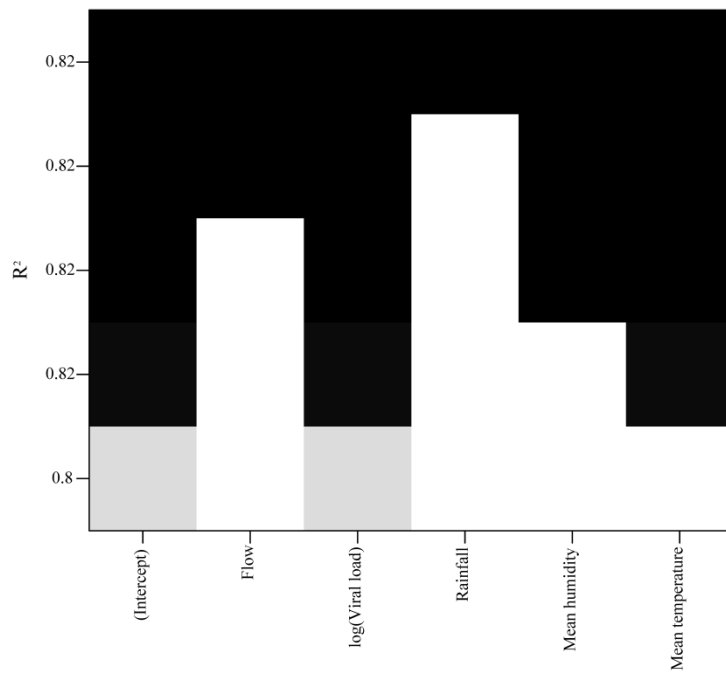

851

852 Figure 9. Multivariate linear model selection using the  $R^2$  maximization criterion. Each  
853 row corresponds with the best model using from one to five predictors. The color of the  
854 row is darker for higher values of  $R^2$ .

855  
856  
857  
858



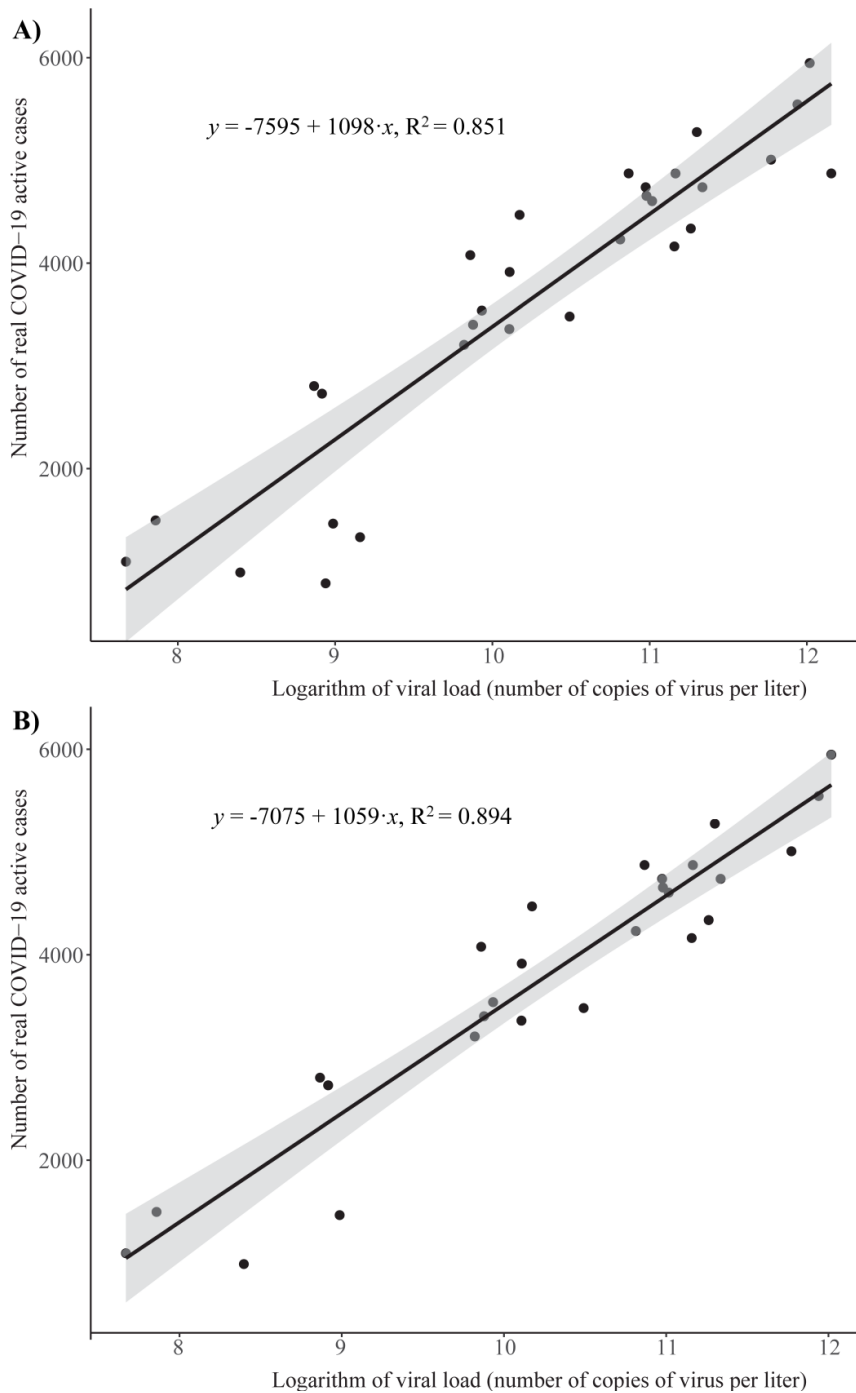

859

860

861 Figure 10. Estimation of the number of COVID-19 real active cases using a linear  
862 regression model. Scatterplot represents the logarithm of the viral load measured in  
863 WWTP Bens and the estimated number of COVID-19 real active cases before (A) and  
864 after (B) removing the three outliers detected. The linear fit (black line) and the  
865 confidence band (grey shaded area) are also included.

866

867

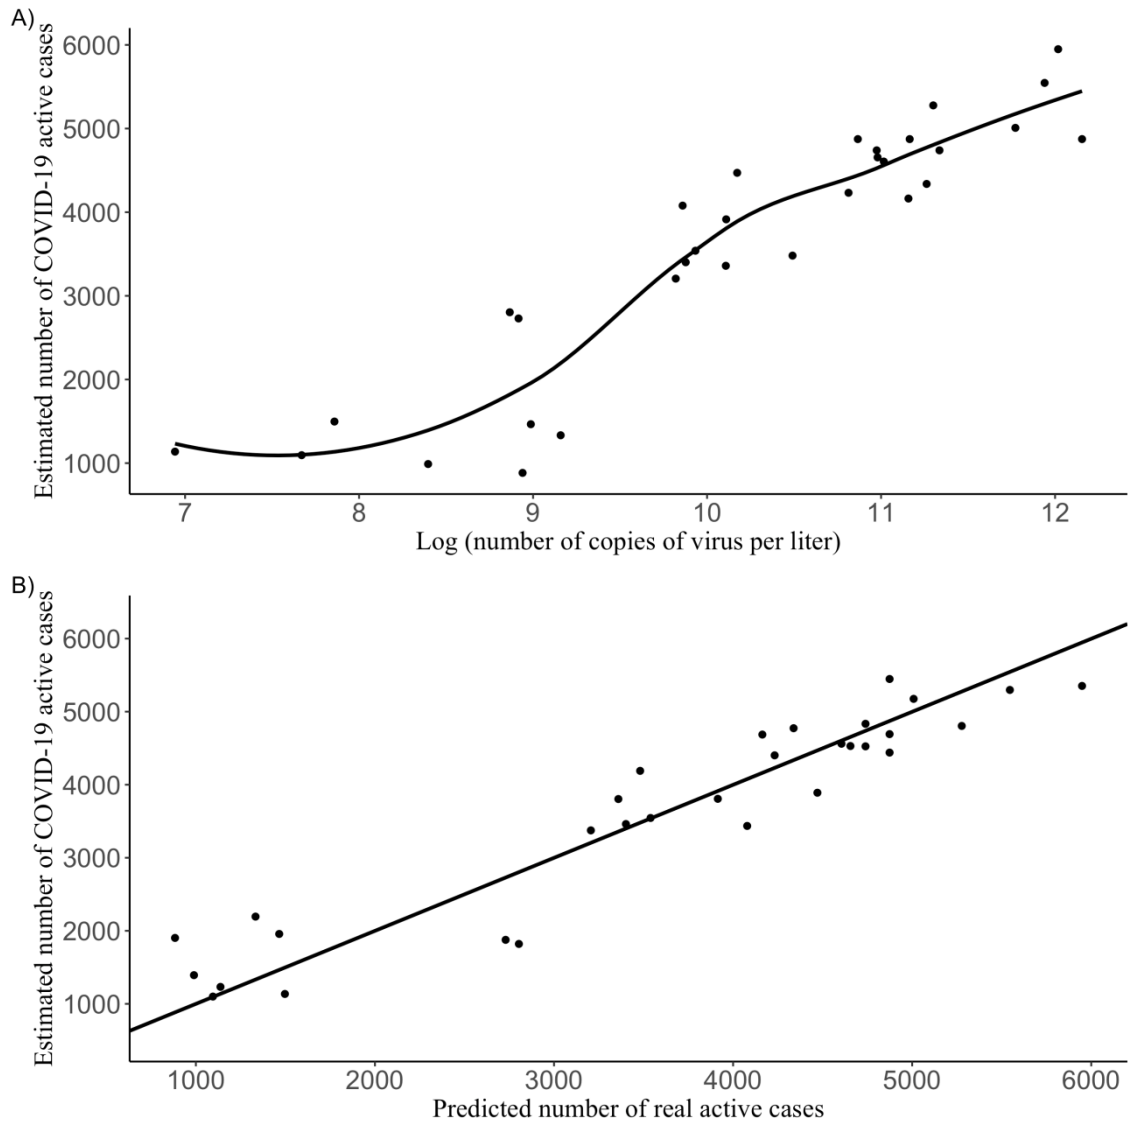

868

869

870 Figure 11. Estimation of number of real COVID-19 active cases using the quadratic

871 LOESS model. A) Estimated COVID-19 active cases in the metropolitan area vs the

872 natural logarithm of the viral load. B) Estimated number of COVID-19 active cases in

873 the metropolitan area vs the predicted number of COVID-19 real active cases.

874

875

876

877
